# Supplementary material
Source: bioRxiv or medRxiv preprint supplement (https://www.biorxiv.org/content/biorxiv/early/2019/10/15/803262/DC1/embed/media-1.pdf)
Supplement: Supplementary file [file media-1.pdf]

## Supplementary Materials for

### **Sex-specific pathophysiological mGluR5-dependent A $\beta$ oligomer signaling in Alzheimer mice**

Khaled S. Abd-Elrahman, Alison Hamilton, Jessica M. de Souza, Awatif Albaker, Fabiola M. Ribeiro and Stephen S. G. Ferguson

Correspondence to: [sferguso@uottawa.ca](mailto:sferguso@uottawa.ca)

# Figure S1

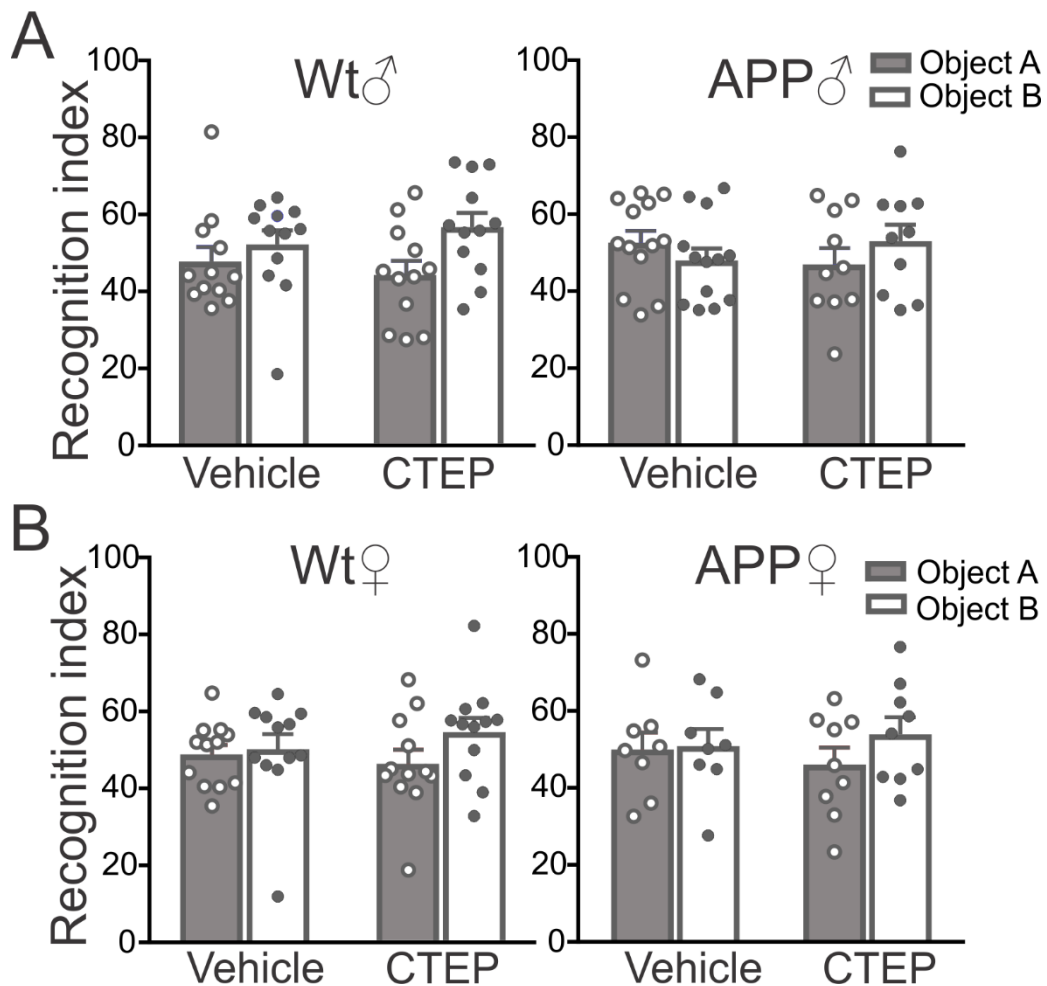

**Fig. S1: CTEP does not alter recognition scores of male and female APPswe mice when exposed to identical objects.**

Mean  $\pm$  SEM of recognition index, for exploring two identical objects in the first day of novel object recognition test following 12-week treatment with either vehicle or CTEP (2mg/kg) in 9-month-old **(A)** male APPswe/PS1 $\Delta$ E9 (APPswe) and age-matched wild-type (Wt) mice **(B)** female APPswe and age-matched Wt mice (n=8-11). Statistical significance was assessed by two-way ANOVA and Fisher's LSD comparison.

# Figure S2

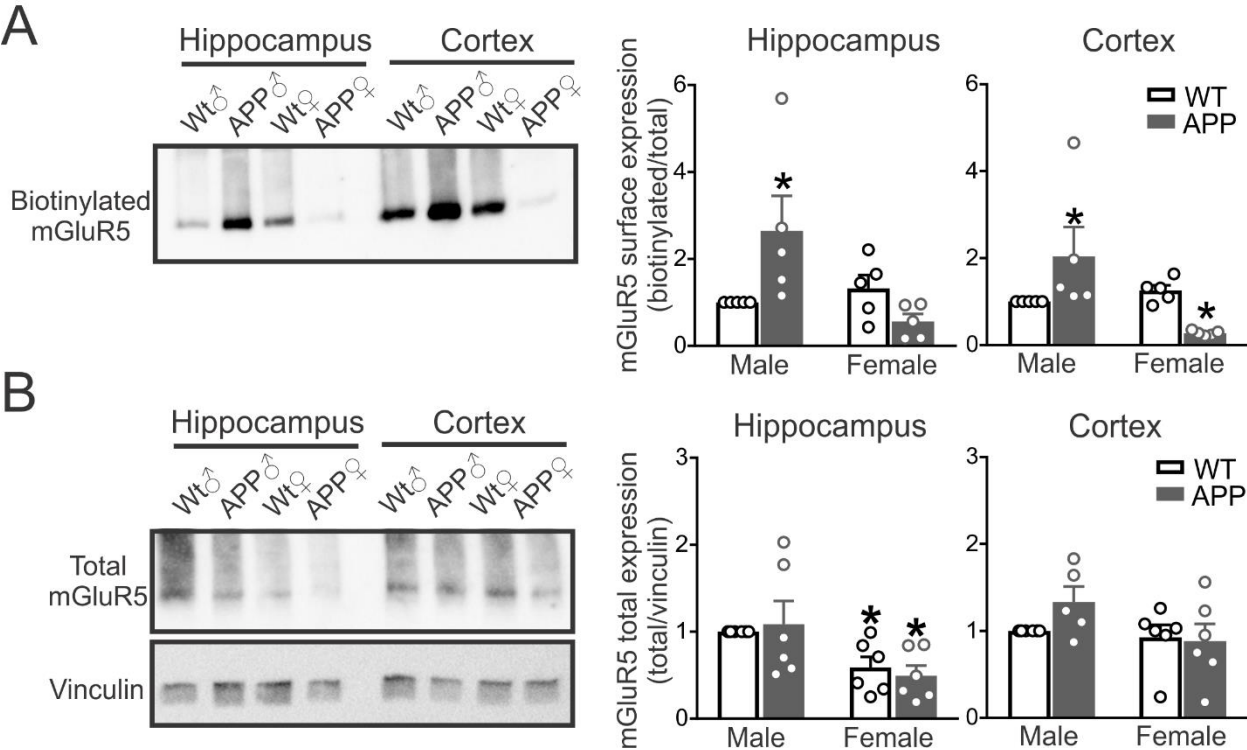

**Fig. S2: Differential mGluR5 cell surface expression between 2-month-old male and female APP<sup>swe</sup>/PS1 $\Delta$ E9.**

Representative western blots and mean  $\pm$  SEM of mGluR5 cell surface expression **(A)** and total expression **(B)** in cortical and hippocampal brain lysates from age-matched 2-month-old male and female wild-type (Wt) and APP<sup>swe</sup>/PS1 $\Delta$ E9 (APP) mice. Values are expressed as a fraction of the male vehicle-treated control for each brain region. Surface expression represents quantification of biotinylated mGluR5 relative to total mGluR5 expression. Total mGluR5 expression was normalized to vinculin (n=6 for each group). \* P<0.05 versus corresponding male Wt mice. Statistical significance was assessed by two-way ANOVA and Fisher’s LSD comparison.
